# Supplementary material
Source: PubMed Central journal article supplement (PMC5543327)
Supplement: jamadermatol-153-651-s001.pdf [file jamadermatol-153-651-s001.pdf]

## Supplementary Online Content

Alegría-Landa V, Rodríguez-Pinilla SM, Santos-Briz A, et al.  
Clinicopathologic, Immunohistochemical, and Molecular Features of  
Histiocytoid Sweet Syndrome. *JAMA Dermatology*. Published online  
March 15, 2017.  
doi:10.1001/jamadermatol.2016.6092

**eAppendix.** Material and Methods

**eFigure 1.** (Case 23) Histopathologic and immunohistochemical features of  
histiocytoid Sweet syndrome

**eFigure 2.** (Case 12) Histopathologic and immunohistochemical features of  
histiocytoid Sweet syndrome with subcutaneous involvement.

**eFigure 1 and 2.** Legends

**eTable 1.** Immunohistochemical markers used in this study

**eTable 2.** Clinical characteristics of this series of histiocytoid Sweet syndrome

This supplementary material has been provided by the authors to give readers  
additional information about their work.

## eAppendix

### MATERIAL AND METHODS

For conventional light microscopy, skin biopsies were fixed in 4% formalin, embedded in paraffin, cut, and stained with hematoxylin-eosin. Automated immunostaining was performed on a BioTek Solutions Tech Mate (Tech-Mate 500; Biotech Solutions, Dako, Glostrup, Denmark). The antibodies used in this study targeted myeloperoxidase (MPO), CD163, MNDA, CD14, CD34 and CD117 (c-Kit). Their specificities and sources are given in eTable 1. To score the IHC results, we considered negative (-), when no cells of the infiltrate were stained with the marker; +/-, when it was expressed by less than 10% of the cells of the infiltrate; +, when it was expressed by 10%-25% of the cells of the infiltrate; ++, when it was expressed by 25%–50% of the cells of the infiltrate; and +++, when it was expressed by 50% or more of the cells in the infiltrate. Double immunostaining was performed by combining pairs of the above mentioned antibodies and each marker was stained with a different color (black and red in each slide). We quantified the cell population that was positive for both markers and, in the same section, and also counted the positive cells for each marker individually. MNDA antibody stains nuclei of myelomonocytic cells, whereas the remainder antibodies mark cytoplasmic antigens.

In 7 cases, fluorescent in situ hybridization (FISH) studies were performed on sections from paraffin-embedded tissue to rule out the presence of genetic abnormalities in the cells of the dermal infiltrate in the context of possible hematological disorder. For the detection of the *bcr/abl* translocation, a spectrum green and spectrum orange labeled probe was used (Abbott Diagnostics, Wiesbaden, Germany). Fluorescent in situ hybridization was performed as previously described.<sup>1</sup> In Case 33, interphase FISH study was performed in paraffin-embedded tissue from the patient. A probe to analyze region 5q was used following manufacturer recommendations (Abbot, Ill, USA). None of the cases of this study was included in the series reported in the original description of HSS.<sup>1</sup>

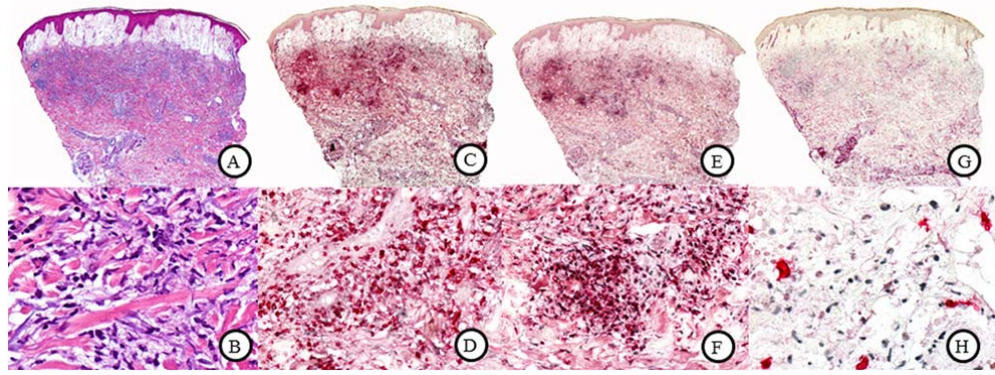

EFig. 1

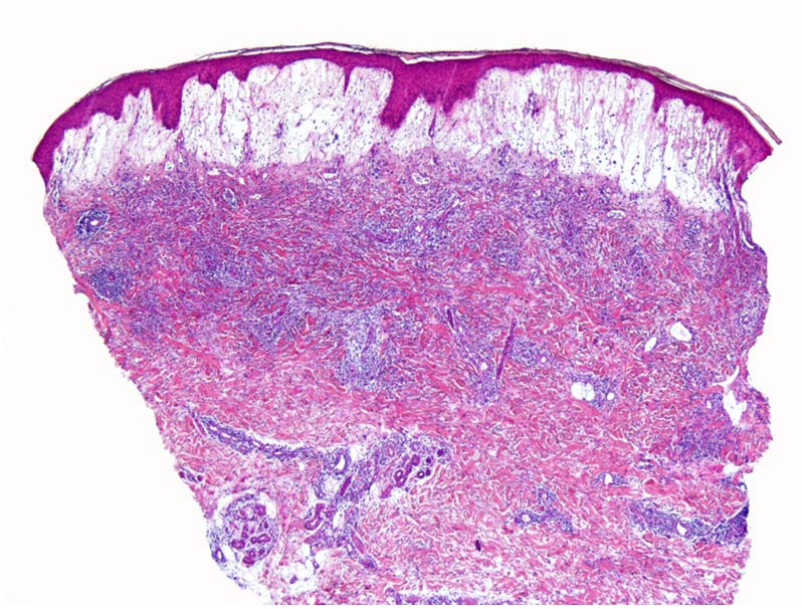

EFig. 1A

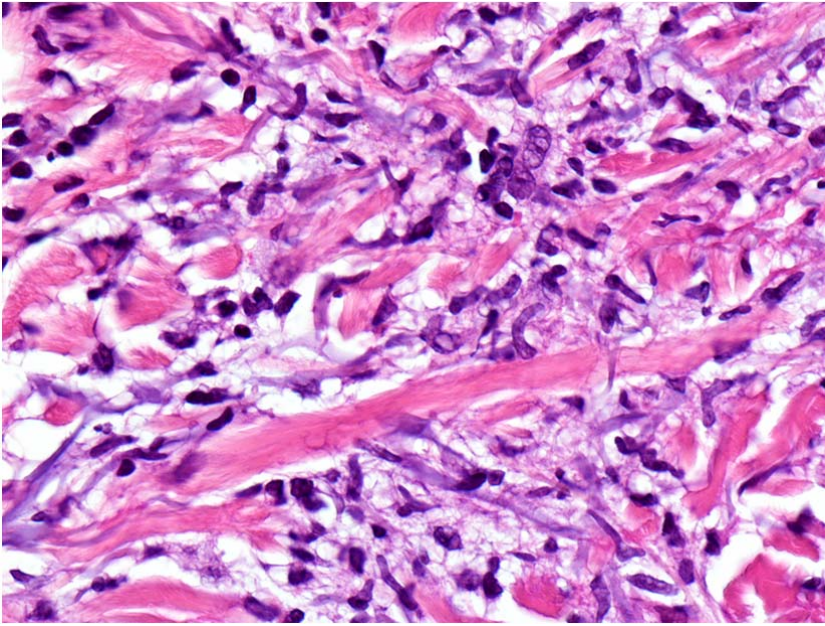

EFig. 1B

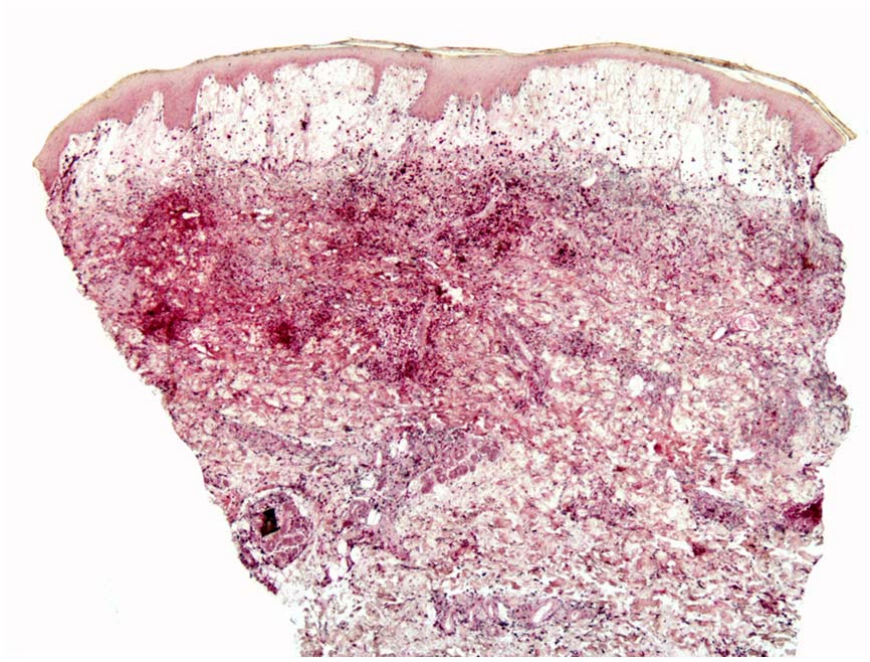

EFig. 1C



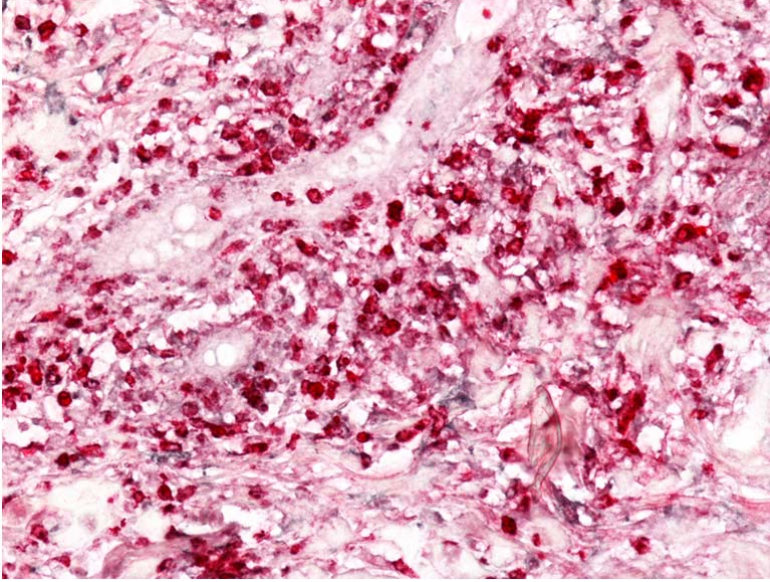

EFig. 1D

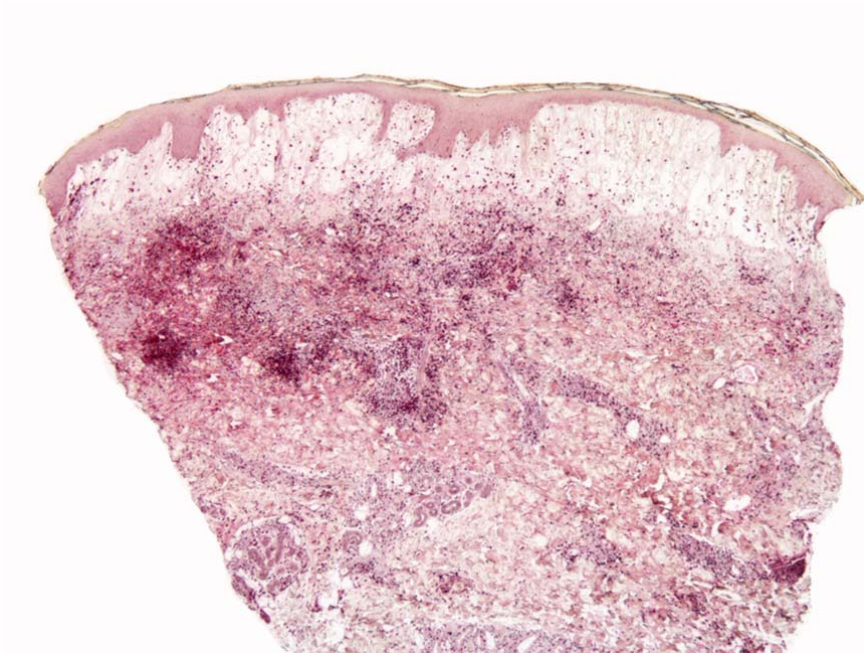

EFig. 1E



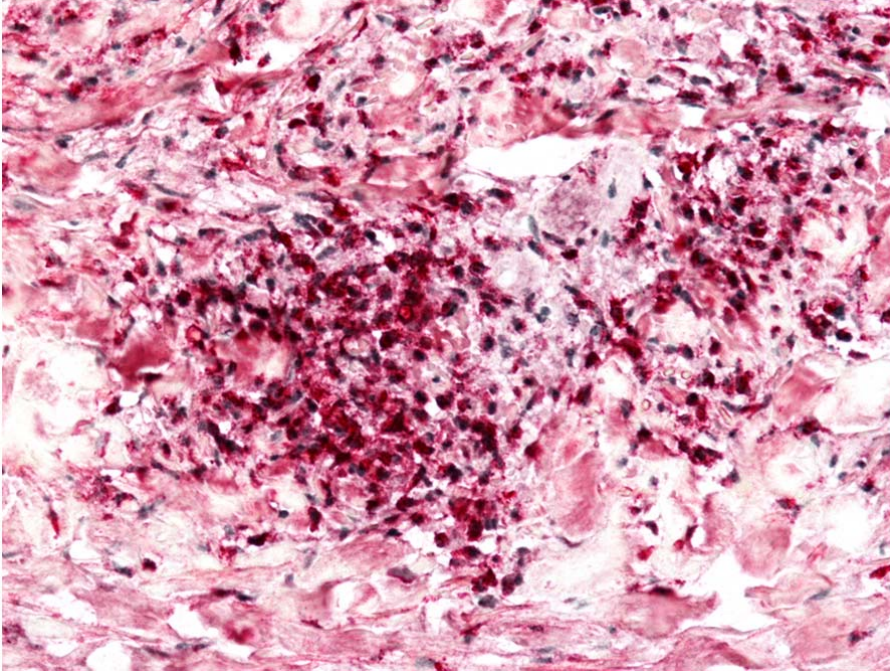

EFig. 1F

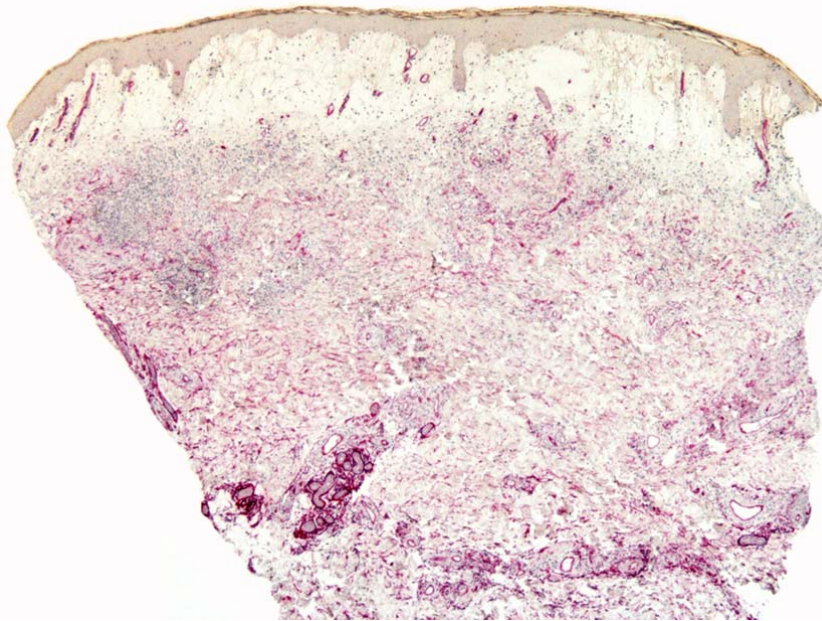

EFig. 1G

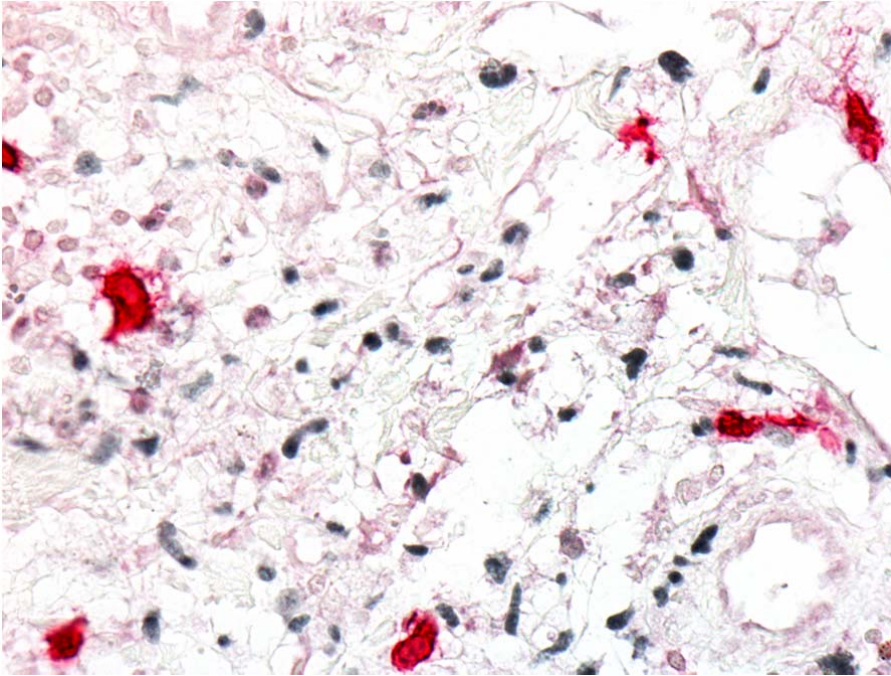

EFig. 1H

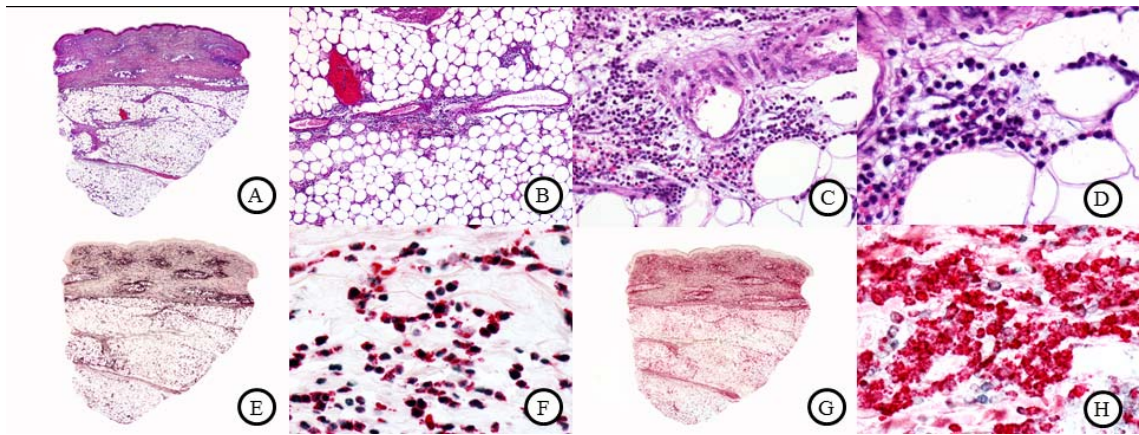

EFig. 2



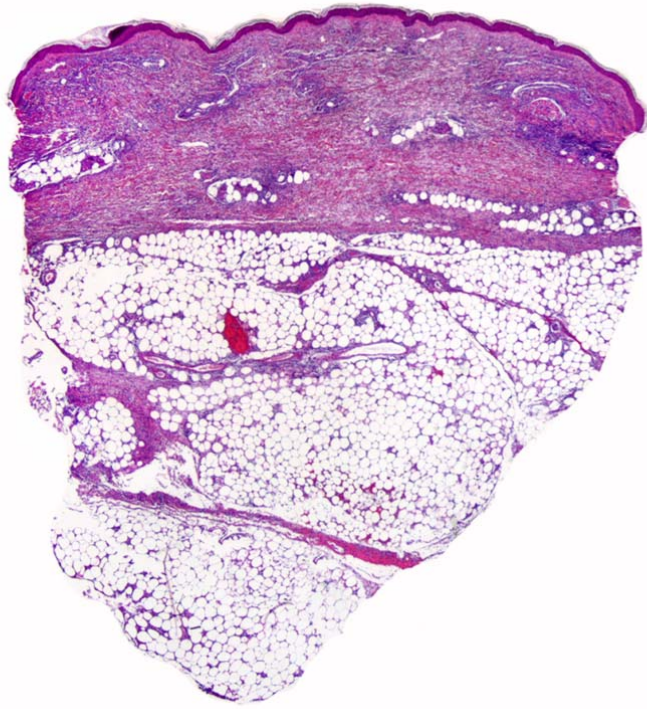

EFig. 2A



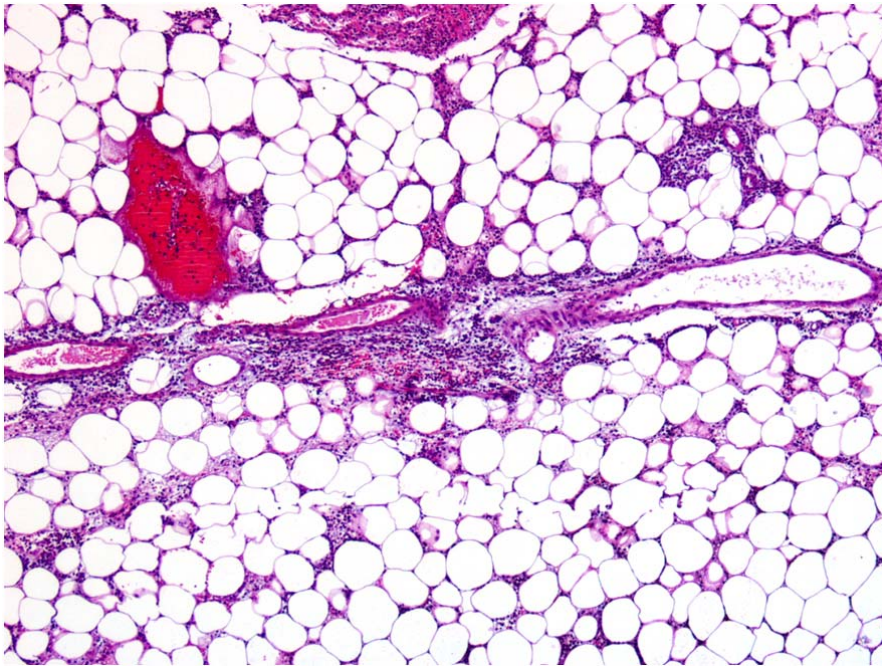

EFig. 2B

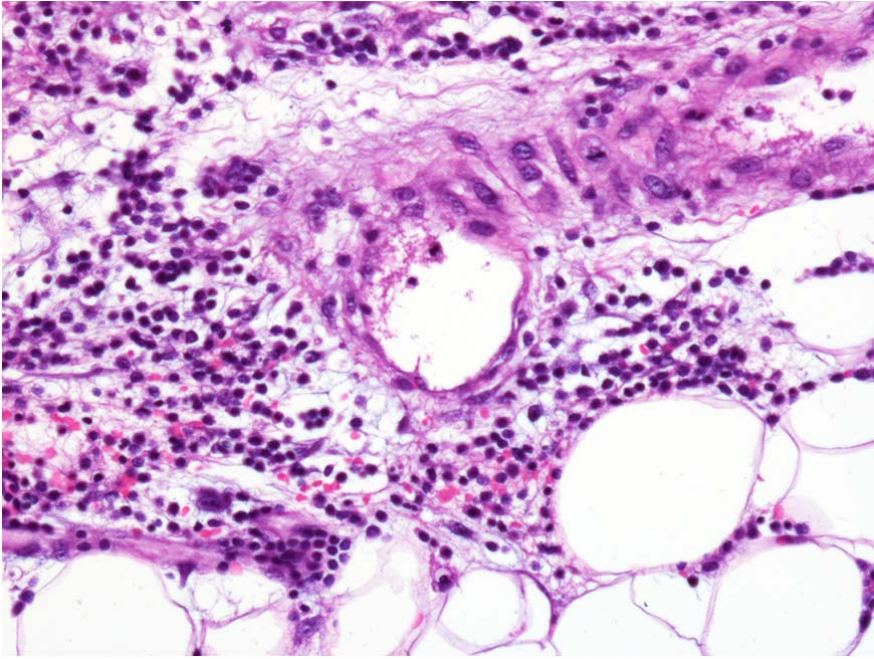

EFig. 2C

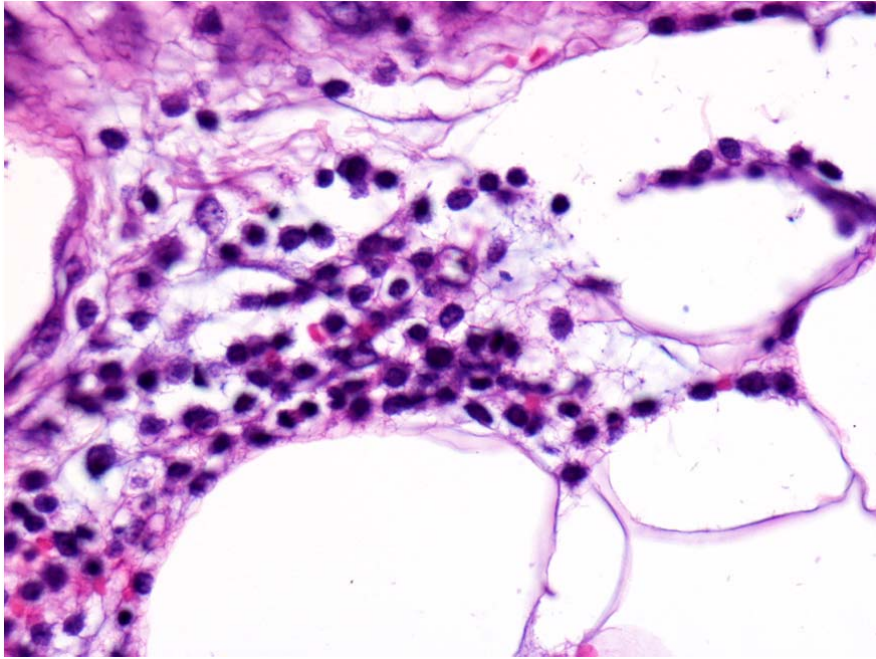

EFig. 2D

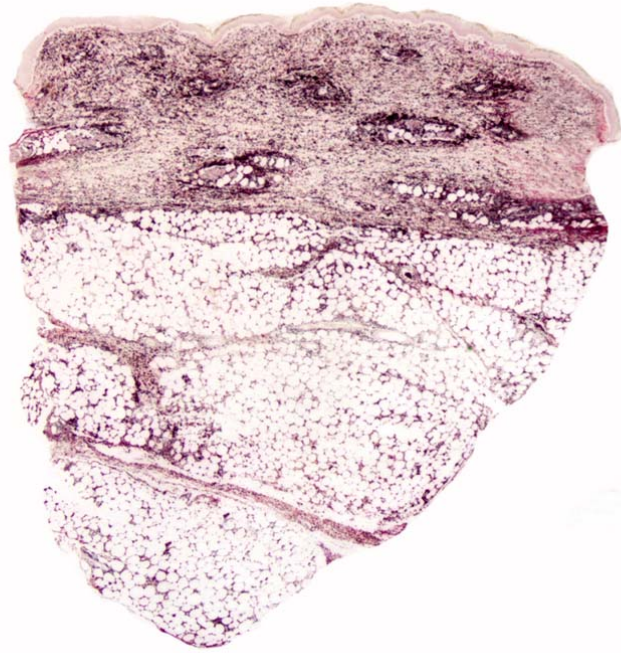

EFig. 2E



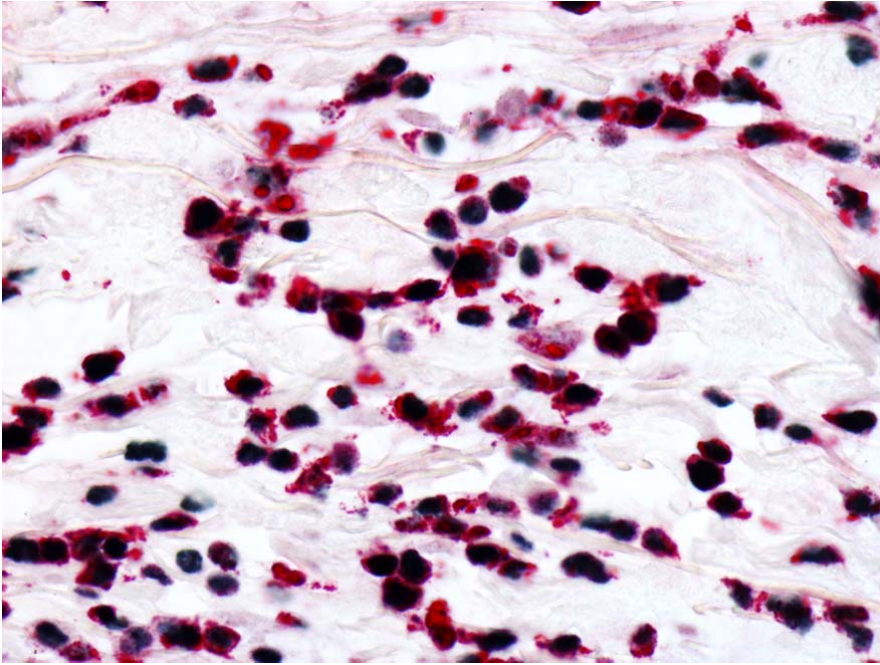

EFig. 2F



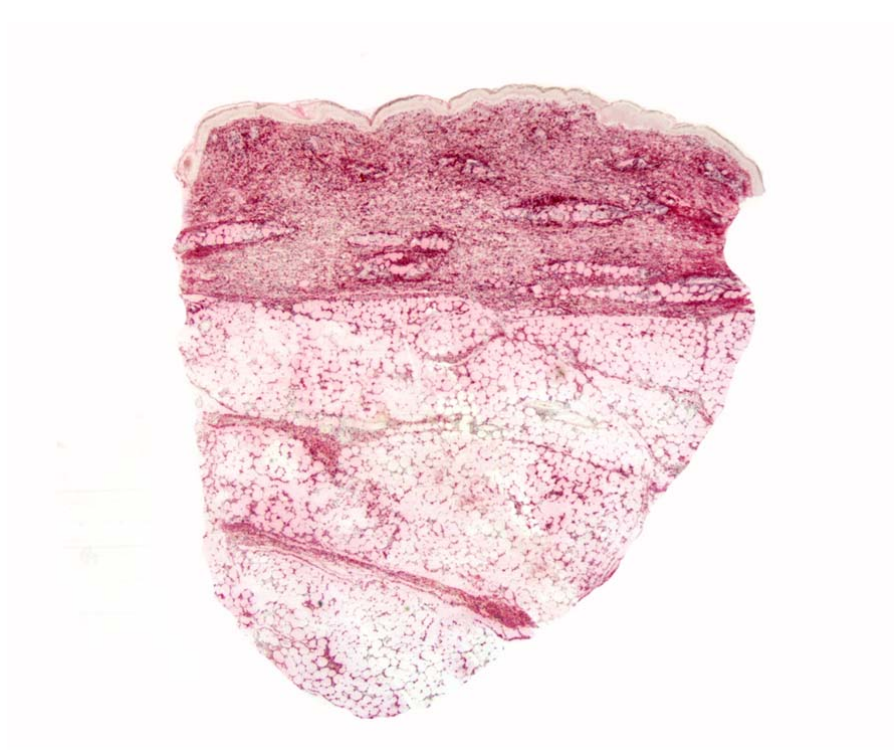

EFig. 2G

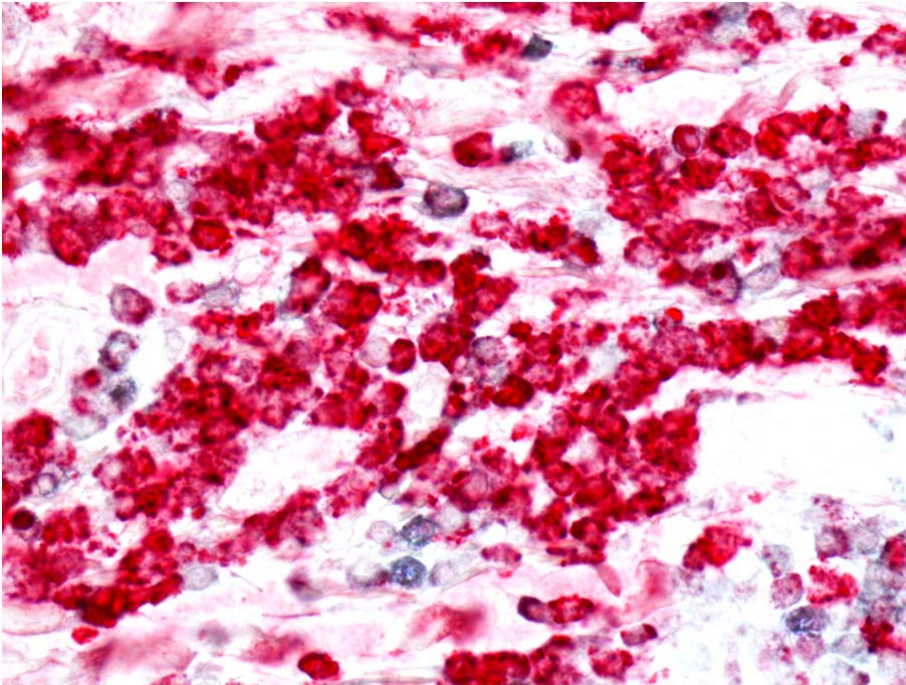

EFig. 2H

**eFIGURE LEGENDS****EFig. 1. (Case 23). Histopathologic and immunohistochemical features of histiocytoid Sweet syndrome.**

**A.** Prominent edema of the papillary dermis with dense dermal infiltrate. **B.** The predominant cells of the infiltrate were mononuclear cells with vesicular twisted nuclei and scant eosinophilic cytoplasm (Hematoxylin-eosin, original magnifications, A x20; B x400). **C.** Double immunostain with MPO (red color) and CD613 (black color). **D.** At higher magnification was evident that most cells expressed MPO (red color), but very few cells expressed CD163 (black color) (Double immunostain with MPO [red color] and CD163 [black color], original magnifications, C x20; D x200). **E.** Double immunostain with MPO (red color) and MNDA (black color). **F.** At higher magnification was evident that most cells co-expressed MPO in their cytoplasm (red color) and MNDA in their nuclei (black color) (Double immunostain with MPO [red color] and MNDA [black color], original magnifications, E x20; F x200). **G.** Double immunostain with CD163 (red color) and MNDA (black color). **H.** At higher magnification was evident that most cells expressed MNDA in their nuclei (black color), but very few cells expressed CD163 in their cytoplasm (red color). There were no cells co-expressing both markers (Double immunostain with CD163 [red color] and MNDA [black color], original magnifications, G x20; H x200).

**EFig. 2 (Case 12). Histopathologic and immunohistochemical features of histiocytoid Sweet syndrome with subcutaneous involvement.**

**A.** Scanning power showing dermal involvement and extension of the infiltrate into the subcutis. **B.** Higher magnification showing that the involvement of the subcutis was mostly septal. **C.** Most of the cells of the septal infiltrate are mononuclear cells. **D.** Still

higher magnification of the mononuclear cells of the infiltrate. (Hematoxylin-eosin, original magnifications, A x10; B, x100; C x200, D x400). **E.** Double immunostain for MPO (red color) and MNDA (black color). **F.** At higher magnification was evident that most cells of the infiltrate co-expressed MNDA in their nuclei (black color) and MPO in their cytoplasm (red color) (Double immunostain for MNDA [black color] and MPO [red color], original magnifications, E x10, F x400). **G.** Double immunostain for MPO (red color) and CD163 (black color). **H.** At higher magnification was evident that most cells expressed MPO (red color) and very few cells expressed CD163 (black color) (Double immunostain MPO [red color] and CD163 [black color], original magnifications, G x10, H x400).

**eTable 1. Immunohistochemical markers used in this study**

| Monoclonal antibody   | Clon and source                                                                                                                                                                                                                                                                                           | Dilution | Myeloblast | Promyelocyte | Myelocyte | Metamyelocyte | Neutrophil | Monoblast | Promonocyte | Monocyte | Histiocyte | Macrophage M2 |
|-----------------------|-----------------------------------------------------------------------------------------------------------------------------------------------------------------------------------------------------------------------------------------------------------------------------------------------------------|----------|------------|--------------|-----------|---------------|------------|-----------|-------------|----------|------------|---------------|
| CD34                  | my10, monoclonal mouse, Beckton-Dickinson, Heidelberg, Germany                                                                                                                                                                                                                                            | 1:100    | ++         | -            | -         | -             | -          | +         | -           | -        | -          |               |
| c-kit/CD117           | Polyclonal rabbit, DAKO, Hamburg, Germany                                                                                                                                                                                                                                                                 | 1:100    | +          | +/-          | -         | -             | -          | +         | -           | -        | -          | -             |
| Myeloperoxidase (MPO) | Polyclonal rabbit, DAKO, Hamburg, Germany                                                                                                                                                                                                                                                                 | 1:4000   | +          | ++           | ++        | ++            | ++         | -         | +/-         | +/-      | -          | +/-           |
| CD163                 | 10D6, Menarini, Berlin, Germany                                                                                                                                                                                                                                                                           | 1:2000   | -          | -            | -         | -             | -          | -         | -           | +/-      | ++         | ++            |
| CD14                  | Polyclonal rabbit, EPR3653, Zytomed, Berlin, Germany                                                                                                                                                                                                                                                      | 1:200    | -          | -            | -         | -             | -          | -         | +           | ++       | ++         | ++            |
| MNDA                  | Gift from Dr. Giovanna Roncador, National Cancer Research Center (NCRC), Madrid, Spain. Also commercially available from European Monoclonal Antibody Network [ <a href="http://www.euromabnet.com/monoclonal-antibodies/mnda/21.html">http://www.euromabnet.com/monoclonal-antibodies/mnda/21.html</a> ] | 1:10     | +/-        | +            | +         | +             | +          | +/-       | +           | +        | -          | +/-           |

(-) Negative results; +/- (Weak positivity of few cells); + (Positivity of few cells); and ++ (Strong positivity of most cells). The red squares highlight the most probable immunophenotype of the predominant cell in histiocytoid Sweet syndrome.



eTable 2. Clinical characteristics of this series of histiocytoid Sweet syndrome

| Case | Gender | Clinical presentation                                            | Associated disorders/clinical outcome                                                                 | Leukemia or other hematologic malignancy                      |
|------|--------|------------------------------------------------------------------|-------------------------------------------------------------------------------------------------------|---------------------------------------------------------------|
| 1    | F      | Figurate erythema                                                | Remission with imatinib                                                                               | MDS, later CML (BCR-ABL +)                                    |
| 2    | M      | Waxing and waning tender papules and nodules mainly on the trunk | Recurrent for 3 years, still recurrent lesions 5 years later, under intermittent systemic steroids    | No                                                            |
| 3    | M      | Tender erythematous nodules on the extremities                   | Upper respiratory tract infection. Resolution                                                         | No                                                            |
| 4    | M      | Tender nodules on the thigh and feet                             | None                                                                                                  | MDS-RAEB, later NRAS- and monosomy 7- associated MDS-RAEB/AML |
| 5    | F      | Papules and nodules on the face, extremities and trunk           | No                                                                                                    | No                                                            |
| 6    | M      | Plaques on extremities                                           | Ulcerative colitis, TNFalpha-induced polymyositis, elevated ANA                                       | No                                                            |
| 7    | F      | Plaques on buttocks, thighs and right breast                     | Hypertension, dyslipidemia, ictus, arthrosis, peripheral vascular disease, fibrocystic breast disease | No (BCR-ABL -)                                                |
| 8    | F      | Erythematous plaques on palms                                    | Right breast intraductal carcinoma treated with surgery + RT + CT                                     | AML                                                           |
| 9    | F      | Plaques on lower extremities and trunk                           | Cardiovascular disease                                                                                | No (BCR-ABL -)                                                |

| Case | Gender | Clinical presentation                     | Associated disorders/clinical outcome                               | Leukemia or other hematologic malignancy |
|------|--------|-------------------------------------------|---------------------------------------------------------------------|------------------------------------------|
| 10   | F      | Plaques on lower extremities and palms    | Hypertension and arthrosis                                          | No (BCR-ABL -)                           |
| 11   | M      | Plaques on extremities and trunk          | Diabetes, tuberculosis, calcified meningioma                        | MDS (BCR-ABL -)                          |
| 12   | F      | Plaques on extremities and trunk          | Cardiovascular disease, renal disease and many others               | MML                                      |
| 13   | M      | Tender plaques on the dorsum of the hands | Hypertension, asthma, hypothyroidism                                | PV, MDS later MML                        |
| 14   | M      | Plaques on the dorsum of the hands        | Crohn's disease                                                     | No                                       |
| 15   | M      | Plaques on upper extremities and trunk    | Diabetes                                                            | MDS-RCMD                                 |
| 16   | M      | Tender plaques on arms                    | Bronchoalveolar carcinoma with mediastinal and pleural infiltration | No                                       |
| 17   | M      | Erythematous plaques on arms              | Ulcerative colitis, diabetes, osteoporosis                          | No                                       |
| 18   | F      | Tender plaques on forehead                | Betalactam allergy                                                  | No                                       |
| 19   | M      | Plaques on the arms                       | Chronic bronchitis                                                  | No                                       |
| 20   | F      | Erythematous plaques on back              | Dyslipidemia                                                        | No                                       |
| 21   | F      | Plaques on the arms                       | Optic neuritis and idiopathic partial deficit of TSH, GH and ACTH   | No                                       |

| Case | Gender | Clinical presentation                                             | Associated disorders/clinical outcome                             | Leukemia or other hematologic malignancy |
|------|--------|-------------------------------------------------------------------|-------------------------------------------------------------------|------------------------------------------|
| 22   | F      | Plaques on forehead                                               | None                                                              | No                                       |
| 23   | F      | Erythematous plaques on head and neck                             | Puerperium                                                        | No                                       |
| 24   | F      | Plaques on back                                                   | Non-Hodgkin lymphoma, diagnosed 5 years later                     | No                                       |
| 25   | F      | Plaques on the back, elbows and face                              | Hypertension, heart disease, left bundle branch block             | No                                       |
| 26   | F      | Plaques on the upper extremities and trunk                        | Dyslipidemia                                                      | No                                       |
| 27   | M      | Plaques on the upper extremities, face and trunk                  | None                                                              | MDS-RAEB                                 |
| 28   | F      | Plaques on the arms                                               | Ulcerative colitis, hypothyroidism and metabolic syndrome         | No                                       |
| 29   | M      | Plaques on the hands                                              | Lung cancer, bladder cancer, hypertension, ischemic heart disease | No                                       |
| 30   | F      | NA                                                                | NA                                                                | No                                       |
| 31   | F      | Waxing and waning tender papule and nodules mainly on extremities | NA                                                                | No                                       |
| 32   | F      | 4 years of waxing and waning lesions on buttocks, thighs, knees,  | None                                                              | No                                       |

| Case | Gender | Clinical presentation                                                             | Associated disorders/clinical outcome | Leukemia or other hematologic malignancy   |
|------|--------|-----------------------------------------------------------------------------------|---------------------------------------|--------------------------------------------|
| 32   | F      | elbows and hands                                                                  |                                       |                                            |
| 33   | F      | 4 years of waxing and waning lesions on upper and lower extremities, mainly hands | None                                  | Monosomy of chromosomes 5 detected by FISH |

MDS: Myelodysplastic syndrome; CML: Chronic myelogenous leukemia; AML: Acute myelocytic leukemia; RAEB: Refractory Anemia with Excess Blasts; RT: Radiotherapy; CT: Chemotherapy; MML: Myelomonocytic leukemia; PV: Polycythemia vera; RCMD: Refractory Cytopenia with Multilineage Dysplasia; NA: Not available.
